# Supplementary material for: Combination Therapy With Canagliflozin Plus Liraglutide Exerts Additive Effect on Weight Loss, but Not on HbA1c, in Patients With Type 2 Diabetes
Source: Oxford University Press journal article supplement (doi:10.2337/dc18-2460), 2020-03-27
Supplement: dc182460supplementarydata.pdf [file dc182460supplementarydata.pdf]

SUPPLEMENTARY DATA

**Supplementary Figure 1.** Time course of change in plasma glucose concentration in the three treatment groups.

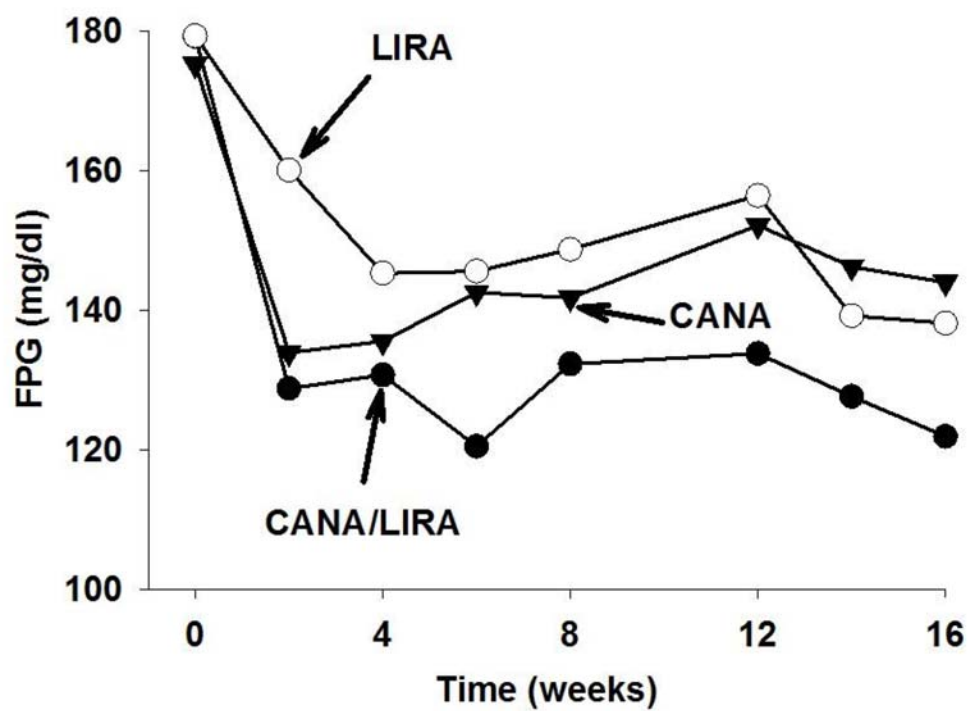

## SUPPLEMENTARY DATA

**Supplementary Figure 2.** Plasma glucose concentration during the EGP measurement at baseline (closed circles) and at 16 weeks (open circles) in subjects received canagliflozin (A), liraglutide (B) and canagliflozin plus liraglutide (C).

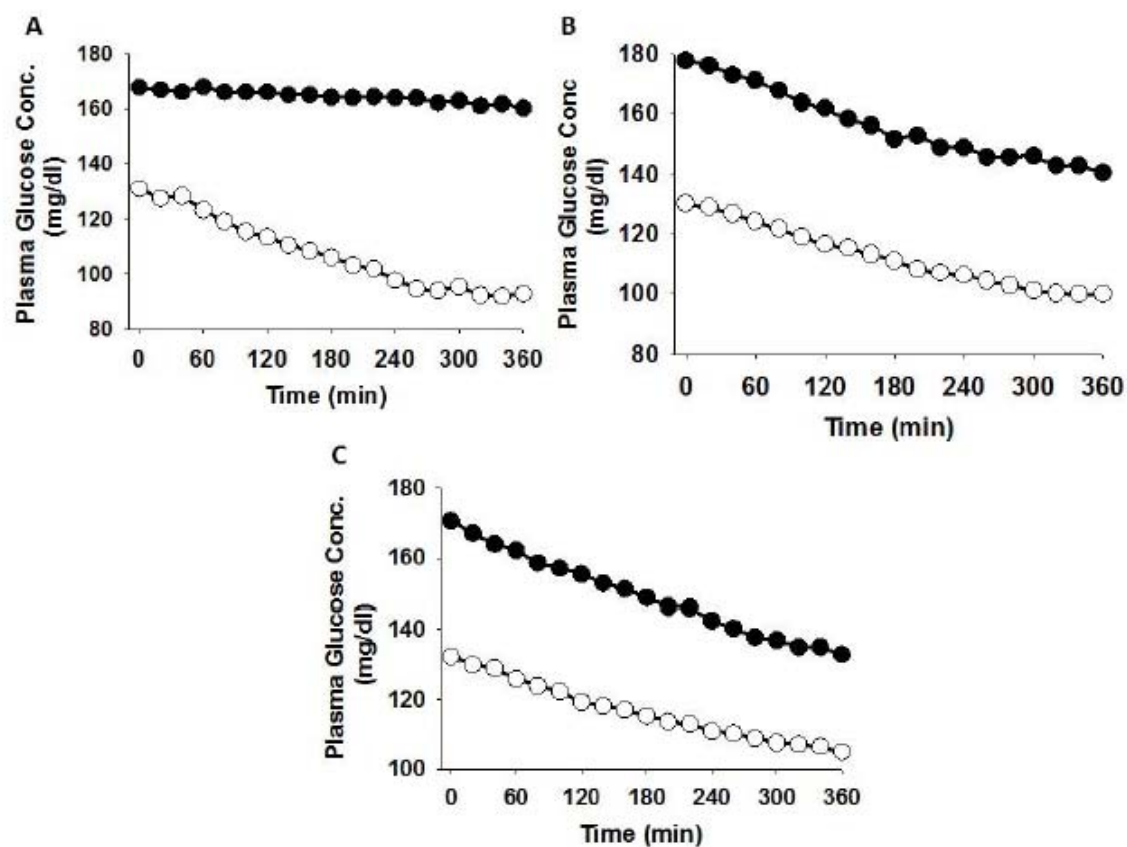

SUPPLEMENTARY DATA

**Supplementary Figure 3.** The relationship between the amount of glucose returned to the circulation over 24 hours (calculated from the change in bEGP) and the amount of glucose excreted in the urine.

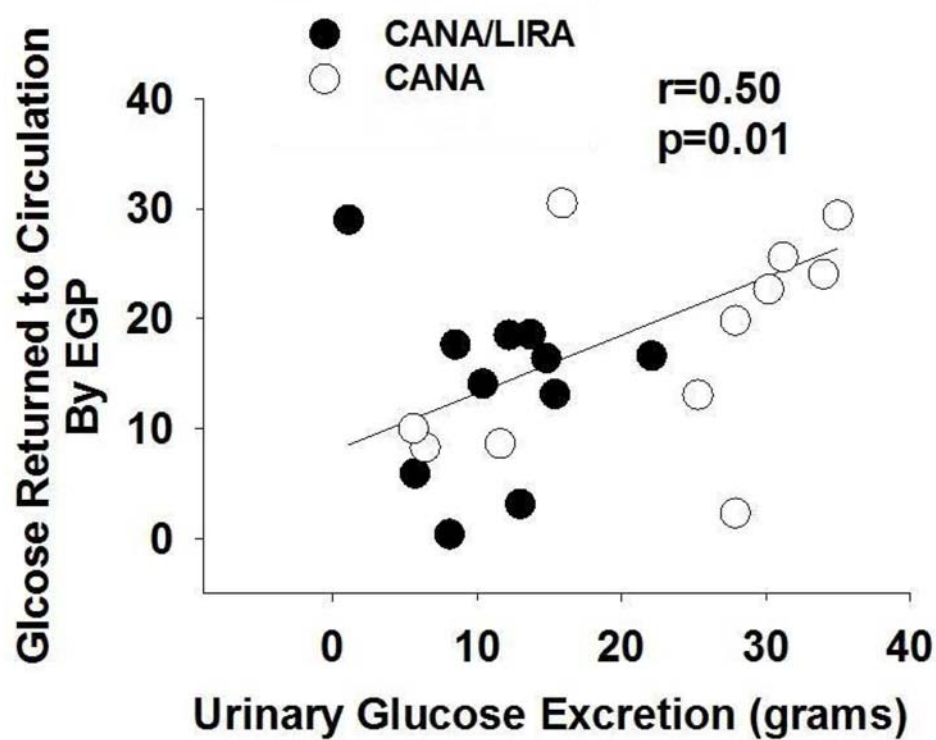

# SUPPLEMENTARY DATA

Supplementary Table 1. baseline patient characteristics

|                                 | Canagliflozin | Liraglutide | Canagliflozin/<br>Liraglutide | P-<br>value |
|---------------------------------|---------------|-------------|-------------------------------|-------------|
| Number                          | 15            | 15          | 15                            |             |
| Age (years)                     | 53±2          | 53±2        | 51±3                          | NS          |
| Gender (m)                      | 10            | 8           | 6                             | NS          |
| Diabetes Duration (y)           | 7.3±1.6       | 7.1±1.4     | 8.3±1.4                       | NS          |
| BMI (kg/m <sup>2</sup> )        | 34.8±1.7      | 35.1±1.1    | 34.8±1.1                      | NS          |
| FPG (mg/dl)                     | 174±12        | 177±10      | 180±15                        | NS          |
| HbA1c (%)                       | 8.2±0.3       | 8.4±0.3     | 8.1±0.3                       | NS          |
| eGFR (ml/min)                   | 97±6          | 105±5       | 92±6                          | NS          |
| Systolic Blood Pressure (mmHg)  | 134±2         | 131±2       | 136±4                         | NS          |
| Diastolic Blood Pressure (mmHg) | 80±3          | 79±2        | 80±3                          | NS          |
| Pulse                           | 70±3          | 76±2        | 76±3                          | NS          |
| Background Medications          |               |             |                               |             |
| Drug Naïve                      | 2             | 1           | 2                             |             |
| Metformin                       | 8             | 9           | 9                             |             |
| Metformin/SU                    | 5             | 5           | 4                             |             |
